# Supplementary material for: A facile and inexpensive approach to improve the performance of silicon film as an anode for lithium-ion batteries
Source: Royal Society of Chemistry journal article supplement (doi:10.1039/c4ta03304c), 2014-07-23
Supplement: c4ta03304c1.pdf [file c4ta03304c1.pdf]

Electronic Supplementary Information

**A facile and inexpensive approach to improve the performance of silicon film as an anode for lithium-ion batteries**

Xiuwan Li, Zhibo Yang, Shumei Lin, Dan Li, Hongwei Yue, Xiaonan Shang, Yujun Fu, and Deyan He\*

School of Physics Science and Technology, and Key Laboratory for Magnetism and Magnetic Materials of the Ministry of Education, Lanzhou University, Lanzhou 730000, China.

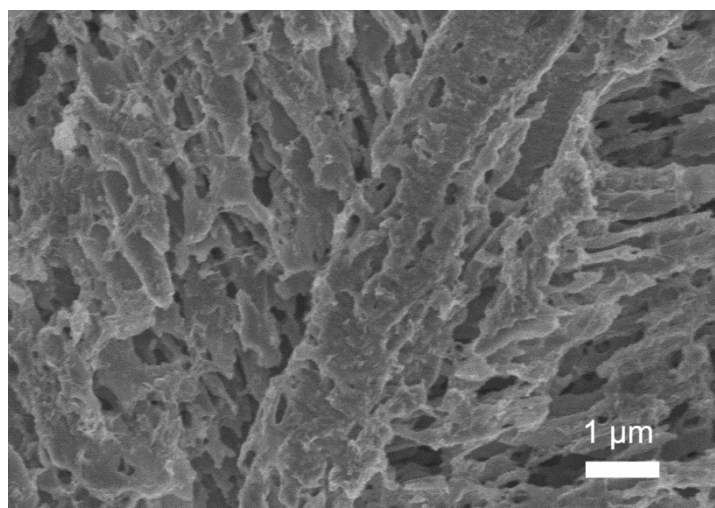

Fig. S1 SEM image of an as-etched SS plate.

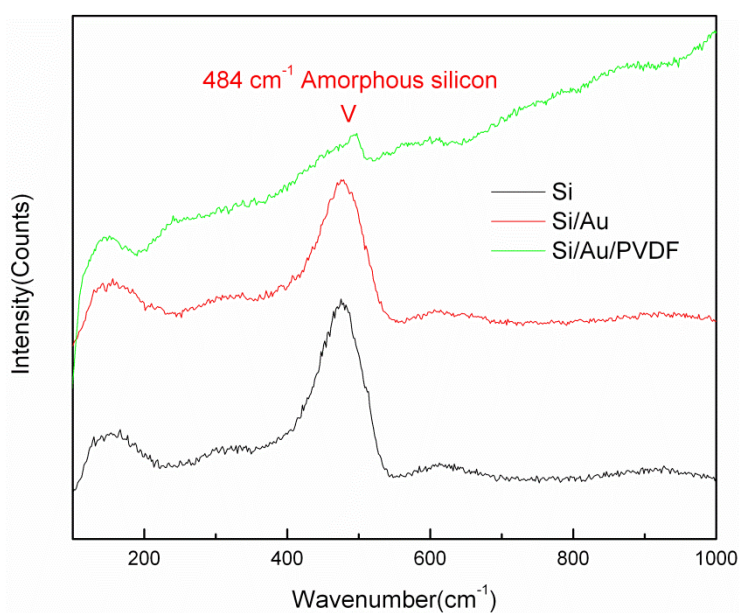

Fig. S2 Raman spectra of the Si, Si/Au, and Si/Au/PVDF film electrodes.

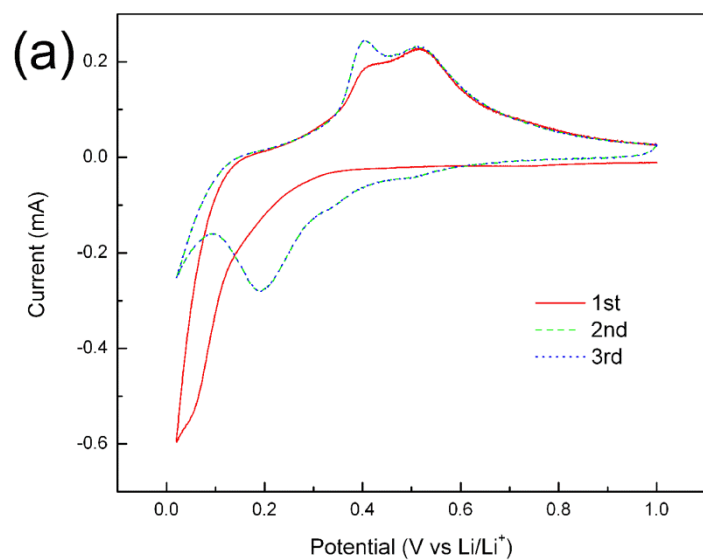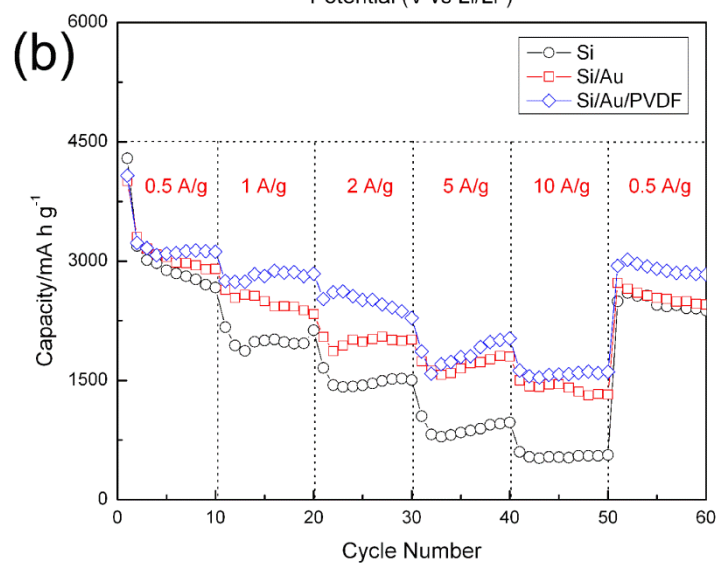

Fig. S3 (a) Cyclic voltammograms for the Si/Au/PVDF film electrode at a scan rate of 0.1 mV s<sup>-1</sup> between 0.02-1.0 V. (b) Capacity retention at various current densities for the Si, Si/Au, and Si/Au/PVDF film electrodes.

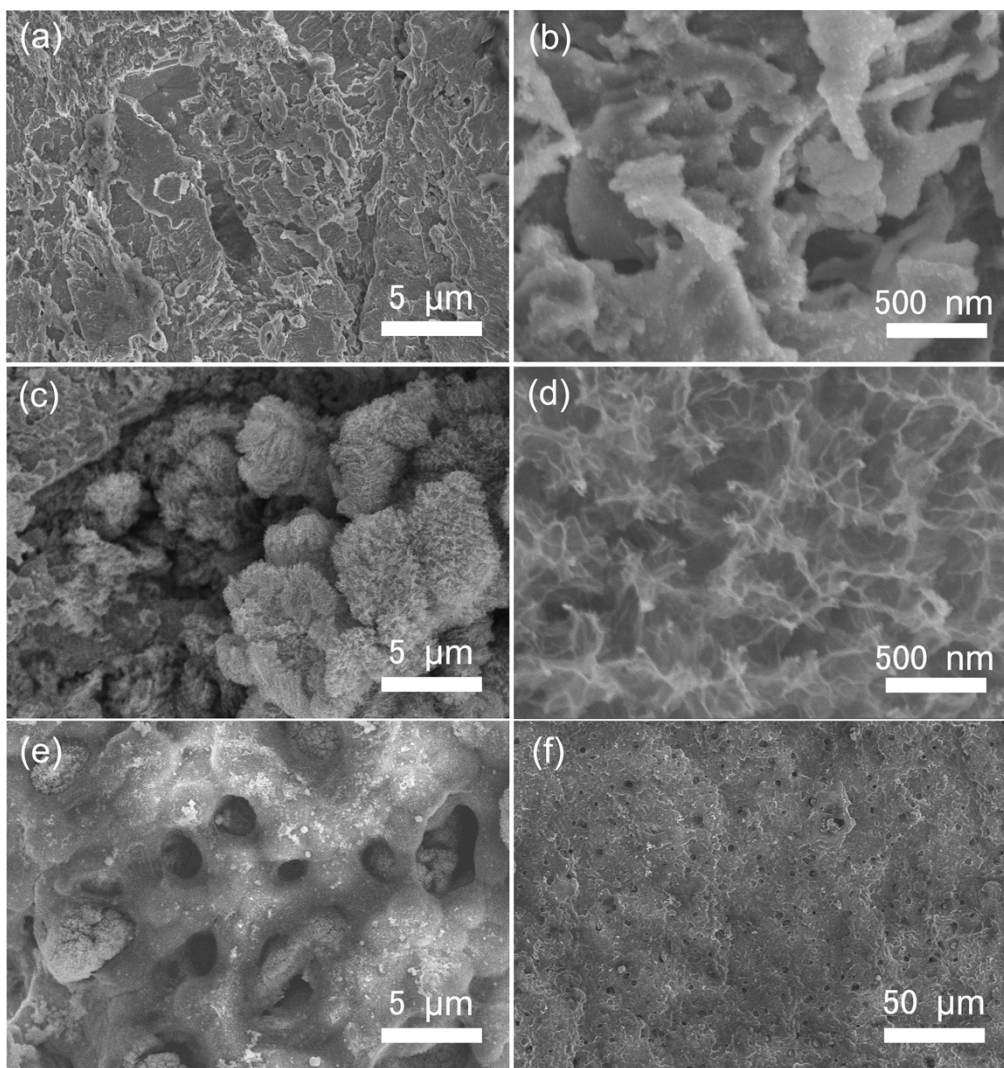

Fig. S4 Morphologies of the electrodes after 100 discharge-charge cycles at  $0.5 \text{ A g}^{-1}$ . (a) Low- and (b) high-magnification SEM images of the Si film electrode. (c) Low- and (d) high-magnification SEM images of the Si/Au film electrode. (e, f) Low-magnification SEM images of the Si/Au/PVDF film electrode.
